# Supplementary material for: RNA-binding protein NONO contributes to cancer cell growth and confers drug resistance as a theranostic target in TNBC
Source: PubMed Central journal article supplement (PMC7381744; doi:10.7150/thno.45037), 2020-07-02
Supplement: thnov10p7974s1.pdf [file thnov10p7974s1.pdf]

**Figure S1**

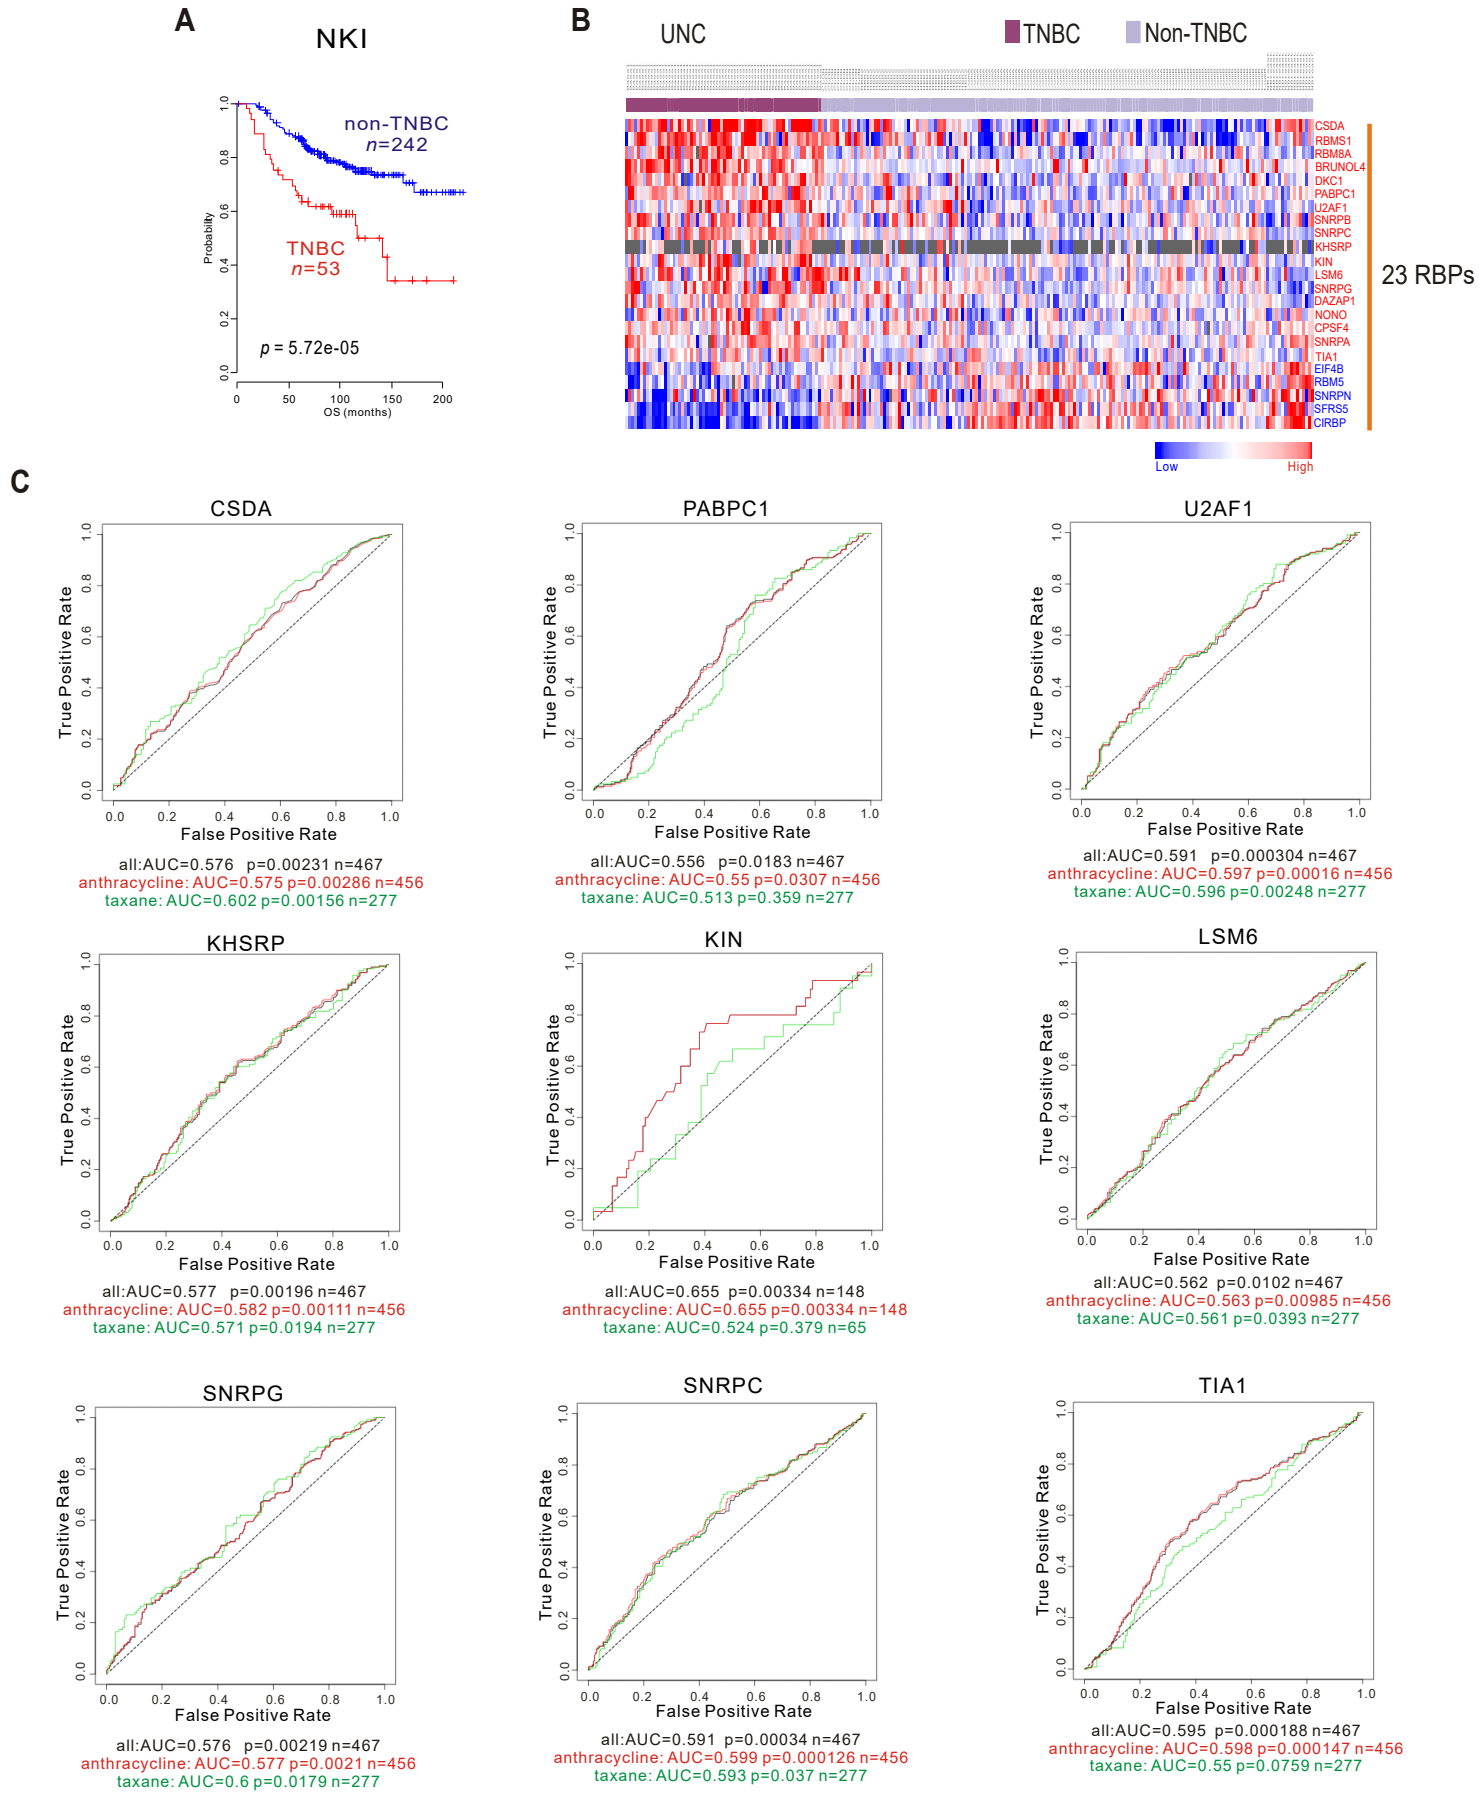

**Figure S1 Genomic analysis of RBPs in human breast cancer.**

A, Kaplan-Meier(KM) plots of NKI breast cancer patients by BC subtypes. B, clustering of RBPs depending on BC subtypes, TNBC and non-TNBC. C, ROC analysis of indicated RBPs from BC patients.

Figure S2

A

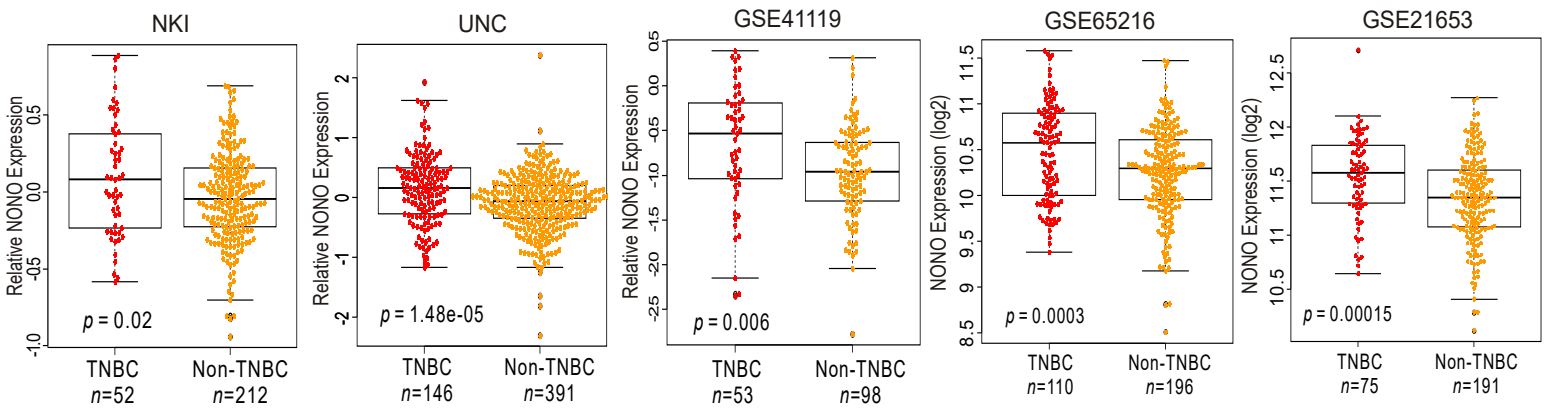

B

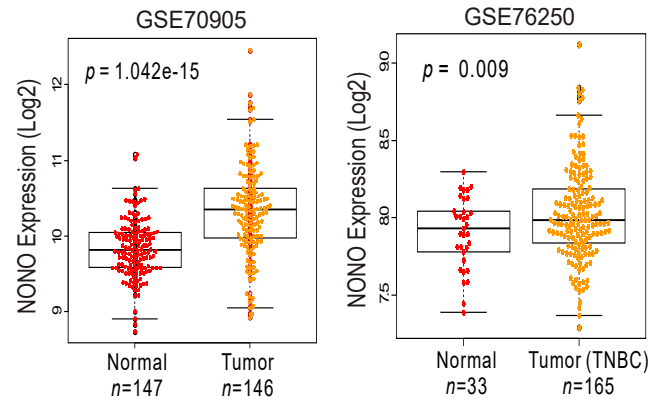

Figure S2 NONO expression in human breast cancer.

A, NONO expression level from indicated BC patient cohorts. B, NONO expression between normal and tumor from indicated BC patients. *p*-value indicates significance of analysis.

**Figure S3**

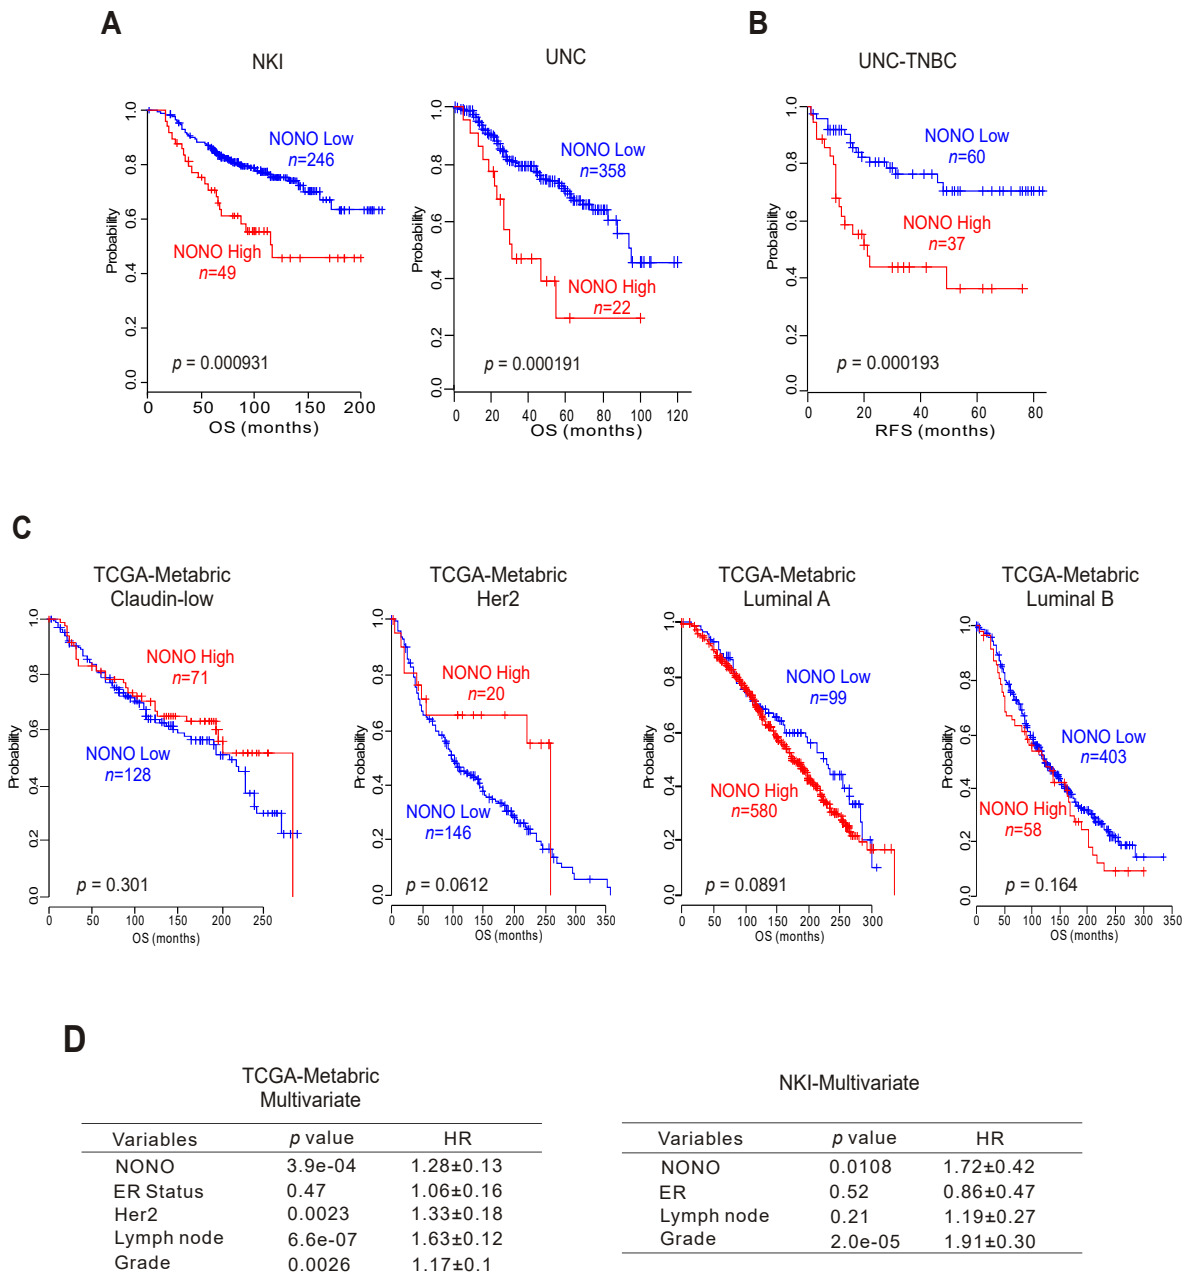

**Figure S3 Survival analysis of NONO in human breast cancer**

A, B and C, using indicated cohort, patients were classified according to the expression level of NONO. Kaplan-Meier plots and the log-rank test were used to estimate patient prognosis. D, multivariate analysis with indicated cohorts (HR; hazard ratio).  $p$ -value indicates significance of analysis.

Figure S4

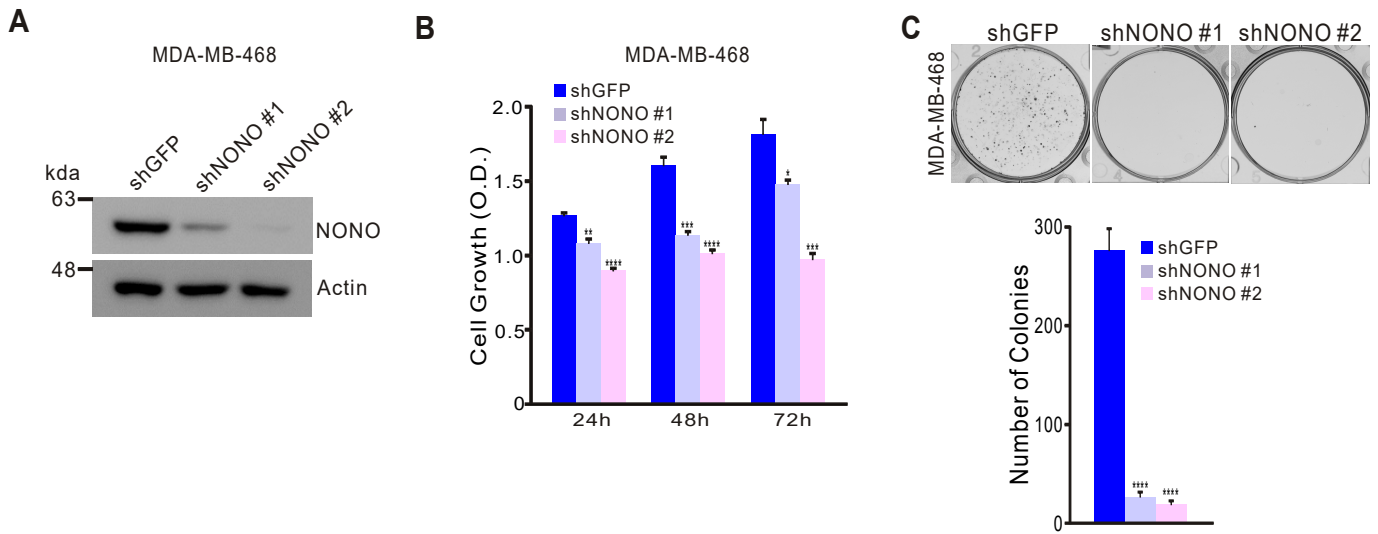

**Figure S4 NONO governs cell proliferation in breast cancer cells**

A-C, MDA-MB-468 breast cancer cells were stably transfected with shNONO or shGFP. The cells were used for western blot (A), CCK8 (B), and colony formation assay (C). Student t-test (two-tailed) was applied to estimate the significance of cell proliferation ( $n=3$ ). \* indicates significance of cell proliferation (\*  $p<0.05$ , \*\*  $p<0.01$ , \*\*\*  $p<0.005$ , and \*\*\*\*  $p<0.001$ ).



**Figure S5**

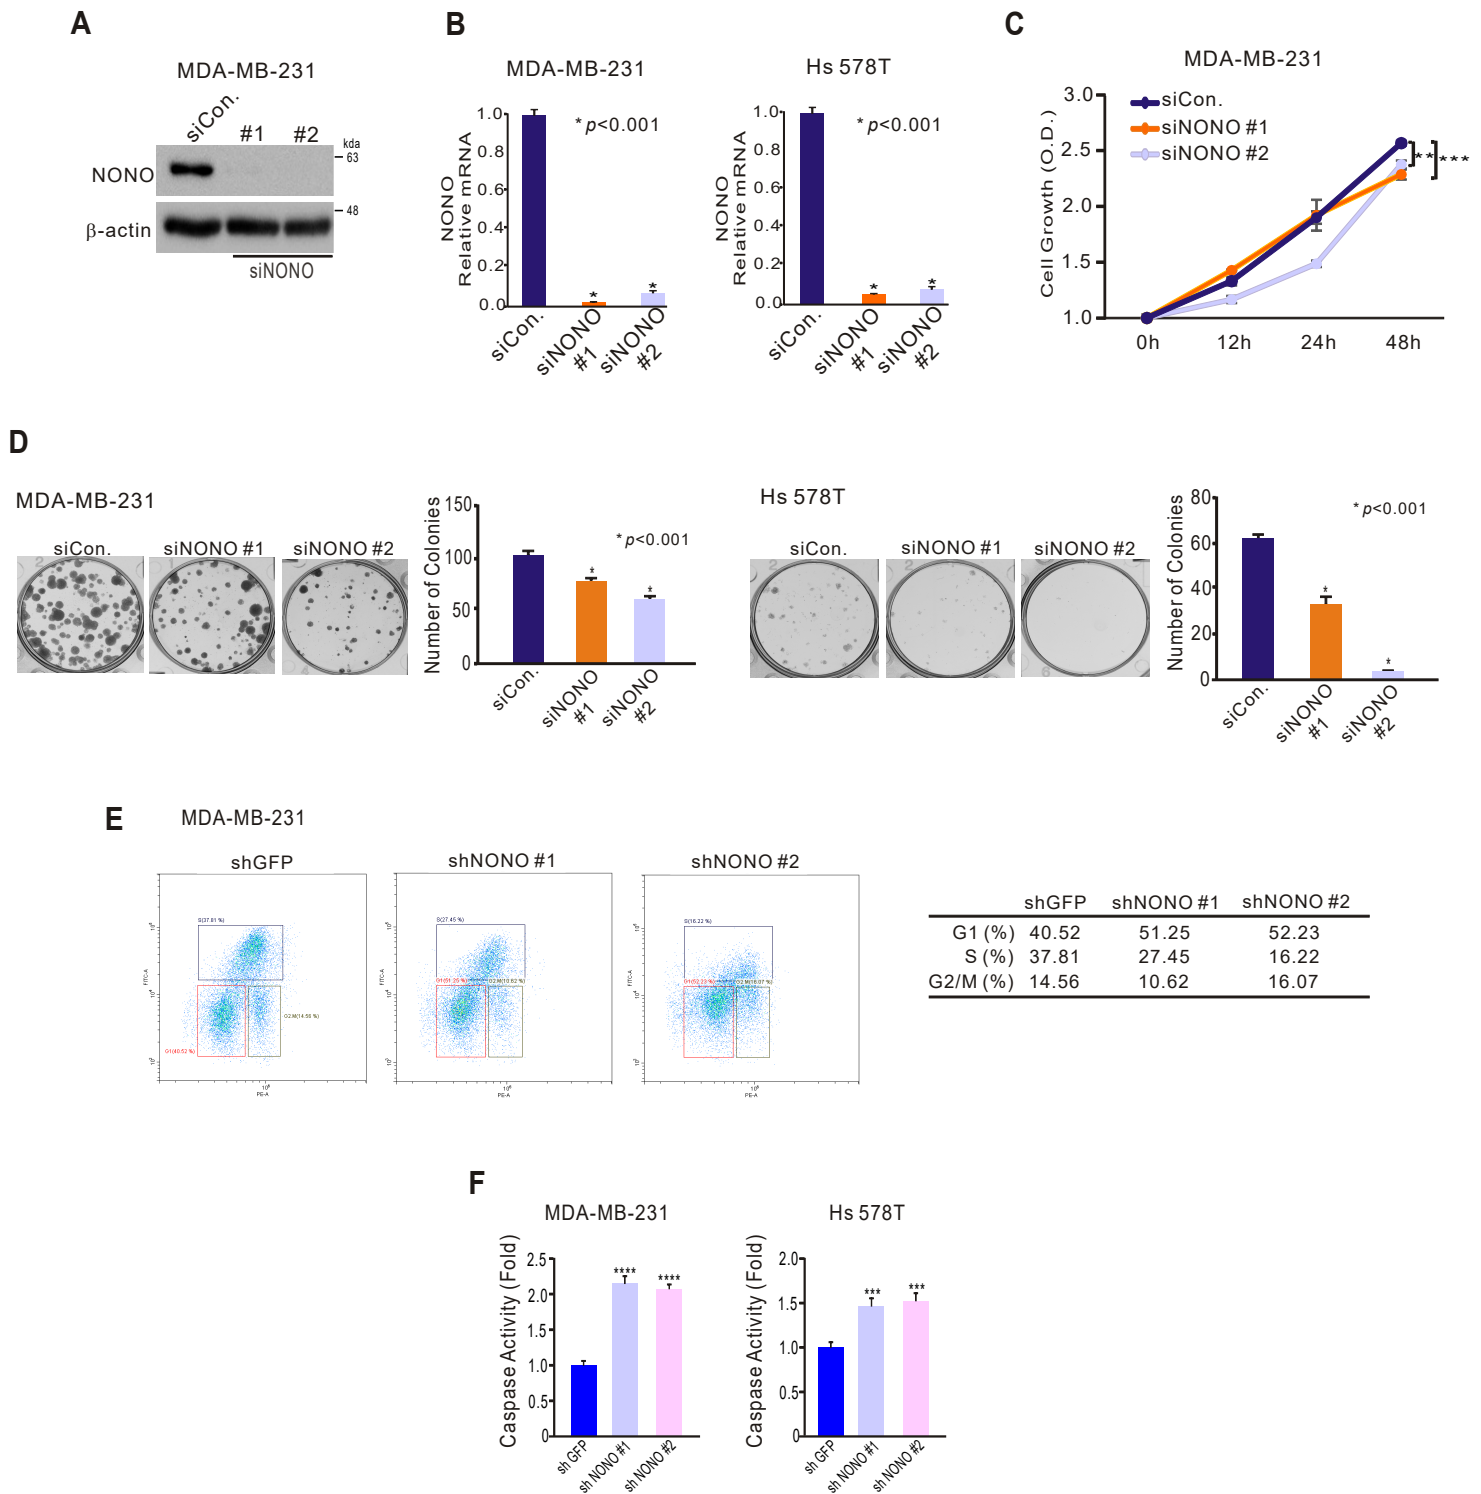

**Figure S5 NONO modulates cell growth and proliferation in breast cancer cells**

A ~ D, Indicated breast cells were transfected with siNONO or siCon. The cells were used for western blot analysis with indicated antibodies (A), and qRT-PCR (B), CCK8 proliferation assay (C) and colony formation assay (D) ( $n=3$ ). (E-F) MDA-MB-231 cells were infected with shNONO or shGFP and stained with EdU and cell cycle was analyzed by FACS (E) and caspase activity was measured (F). Student t-test (two-tailed) was applied to estimate the significance of assay ( $* p < 0.05$ ,  $** p < 0.01$ ,  $*** p < 0.005$ , and  $**** p < 0.001$ ).

**Figure S6**

| <b>NONO<br/>-binding<br/>Rank</b> | <b>Motif</b>                                                                      | <b>STAT3 Locus</b>                                                             |
|-----------------------------------|-----------------------------------------------------------------------------------|--------------------------------------------------------------------------------|
| 1                                 |  | Chr17: 42,313,859 ~ 42,313,866 (M1-1)<br>Chr17: 42,323,456 ~ 42,323,463 (M1-2) |
| 2                                 |  | Chr17: 42,367,511 ~ 42,367,518 (M2)                                            |
| 3                                 |  | Chr17: 42,344,645 ~ 42,344,652 (M3)                                            |
| 4                                 |  | Chr17: 42,345,015 ~ 42,345,022 (M4)                                            |

**Figure S6 NONO binding motifs on the STAT3 RNA**

Enriched RNA motifs among the defined NONO-binding sequences on the STAT3 locus-based on the RNA immunoprecipitation-sequencing (Ref: Benegiamo G et al., Cell Metabolism 27, 404-418, Feb 6 2018).

**Figure S7**

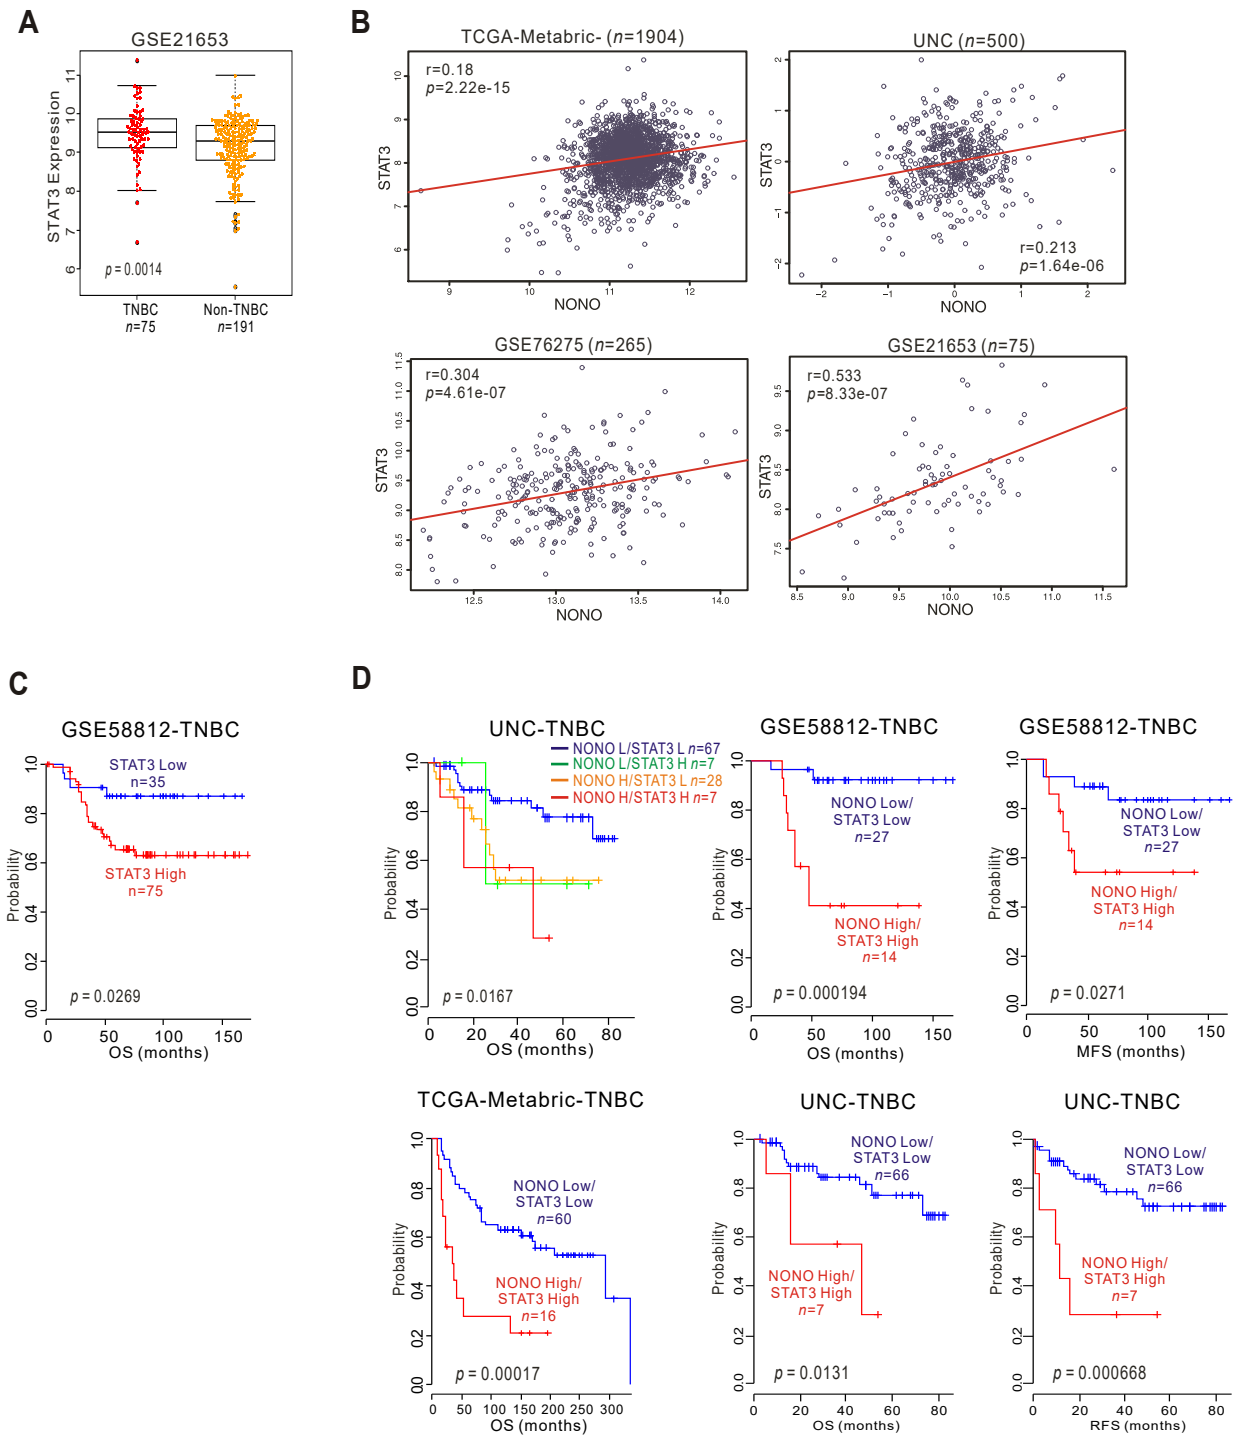

**Figure S7 Clinical relevance of NONO and STAT3 in BC**

A, STAT3 expression between TNBC and non-TNBC from GSE21653 BC patient cohorts. B, Correlation scatter plots between NONO and STAT3 in indicated BC cohorts (TNBC cohorts: GSE76275, GSE21653). C and D, using indicated cohorts, patients were classified according to the expression level of NONO and STAT3. Kaplan-Meier plots and the log-rank test were used to estimate patient prognosis.  $p$ -value indicates significance of analysis.

Figure S8

A

NKI cohort

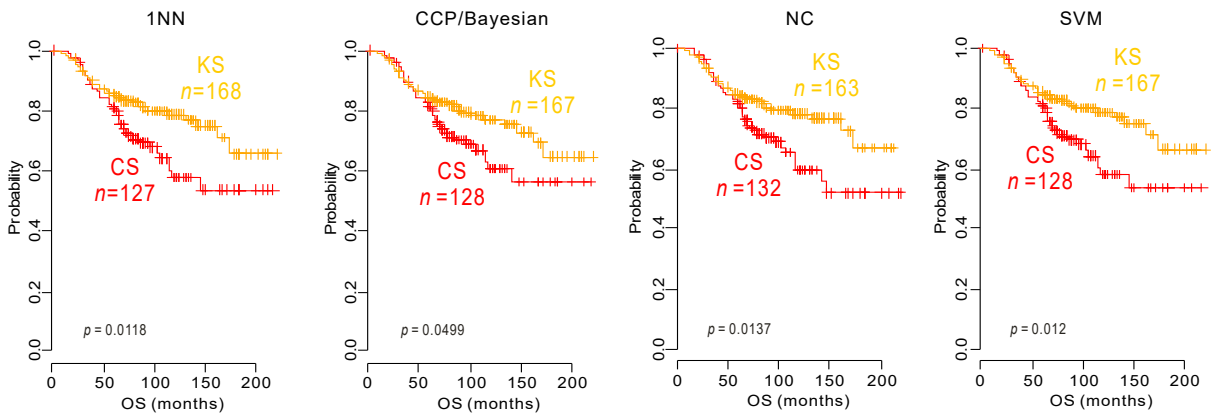

B

Norway cohort

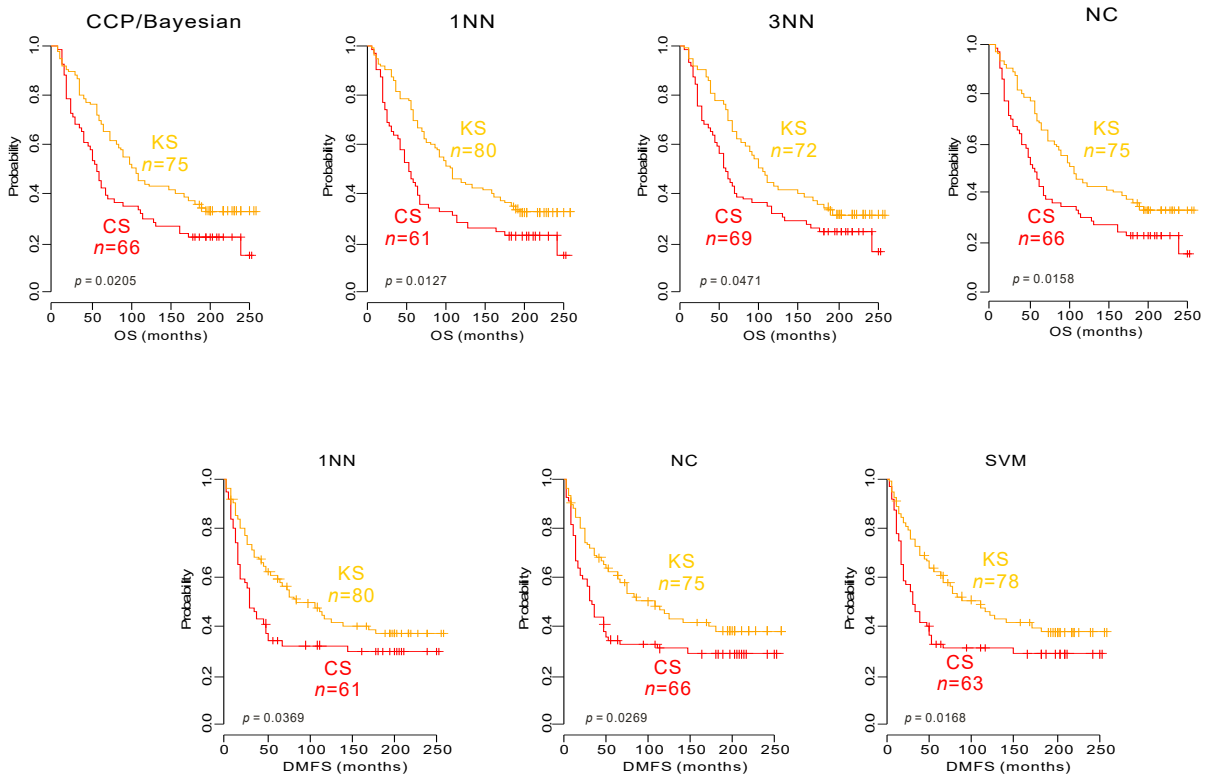

Figure S8 Survival prediction with NONO and STAT3 gene signatures in BC

A and B, Kaplan-Meier plots of OS and DMFS (Distant-metastasis free survival) of BC patients from NKI and Norway cohorts predicted by using shared gene expression signature between NONO and STAT3 with indicated classifiers (CS: Control Signature; KS: Knock down Signature; SC: Compound covariate predictor (CCP), one nearest neighbor (1NN), three nearest neighbor (3NN), nearest centroid (NC), support vector machines (SVM) and linear discriminator analysis (LDA)). *p*-value indicates significance between groups-based on log-rank test.

Figure S9

A

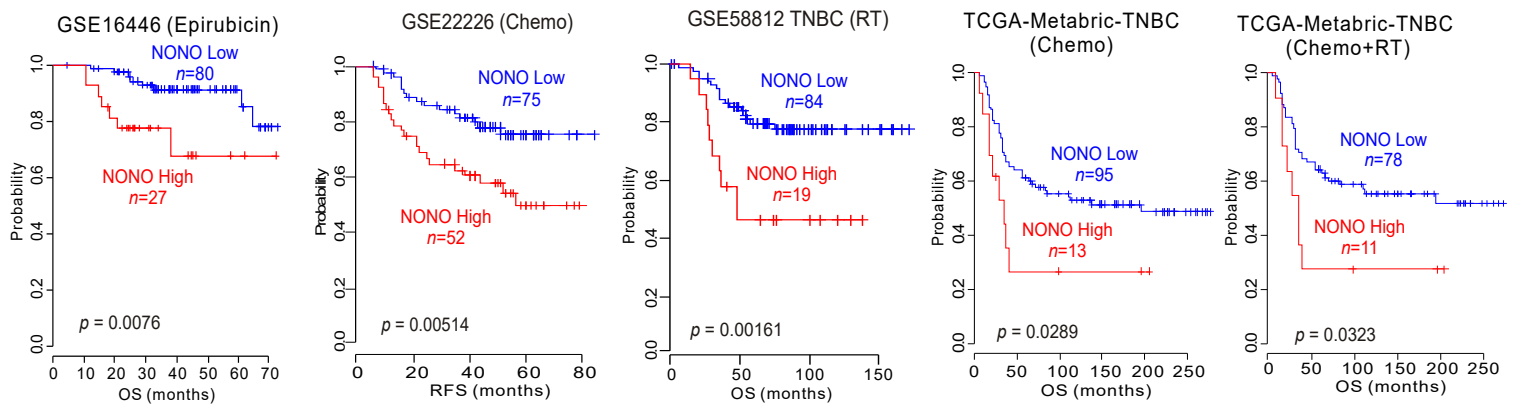

B

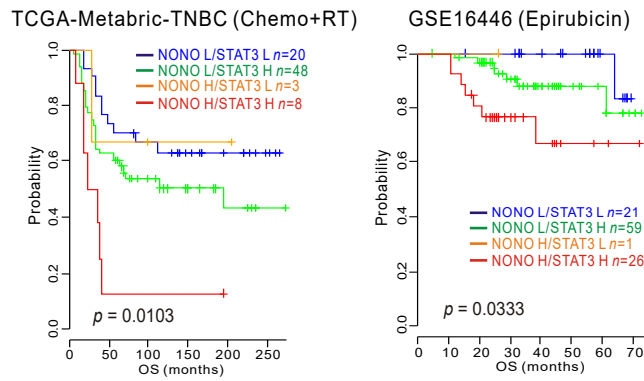

Figure S9 Survival analysis of BC patients by NONO expression

A and B, Kaplan-Meier plots of OS or RFS of BC patients who received indicated therapy in GSE16446, GSE22226, GSE58812 and TCGA data-based on NONO and STAT3 gene expression.  $p$ -value indicates significance of analysis.

Figure S10

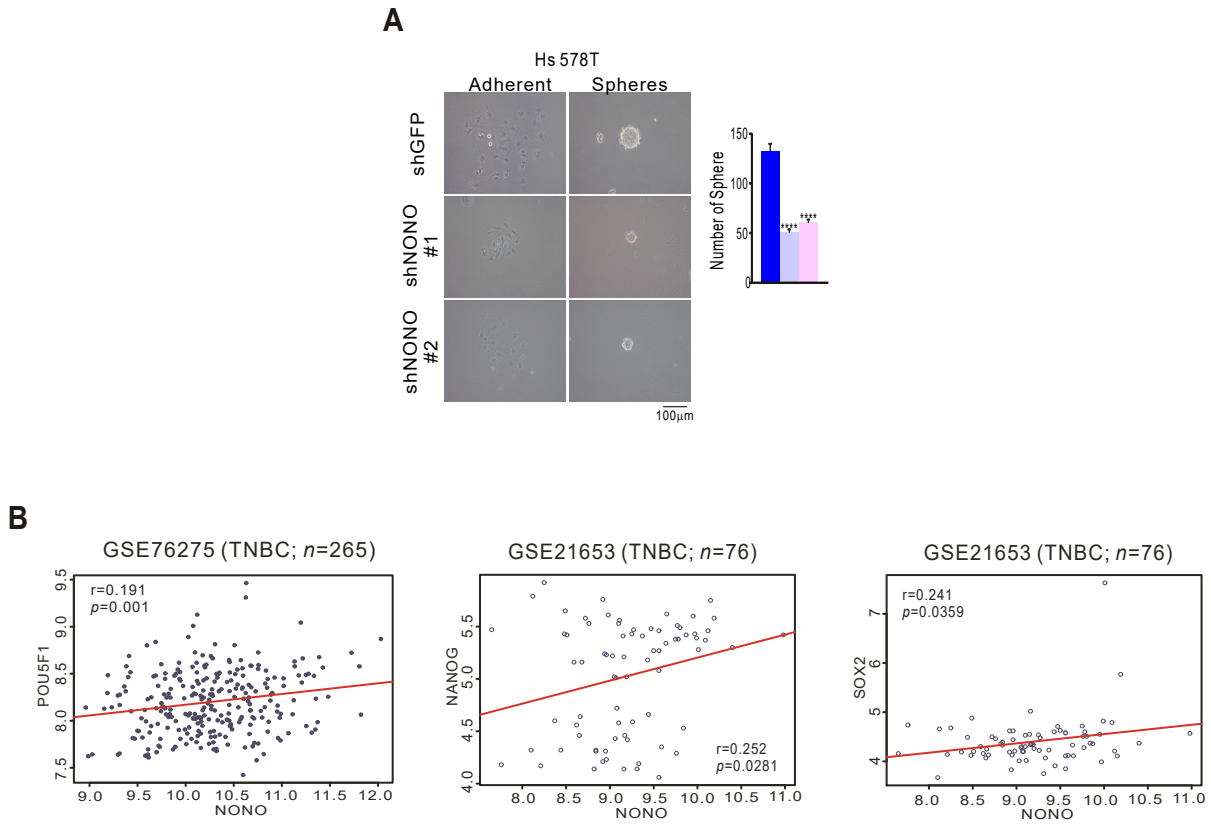

**Figure S10 Correlation of NONO and cancer stem cell (CSC) marker in BC**

A, Hs 578T cell lines were infected with shNONO or shGFP and sphere formation was measured.  
B, Correlation scatter plots between NONO and CSC markers in indicated BC including TNBC cohorts.  $p$ -value indicates significance of analysis (\*  $p < 0.05$ , \*\*  $p < 0.01$ , \*\*\*  $p < 0.005$ , and \*\*\*\*  $p < 0.001$ ).

Figure S11

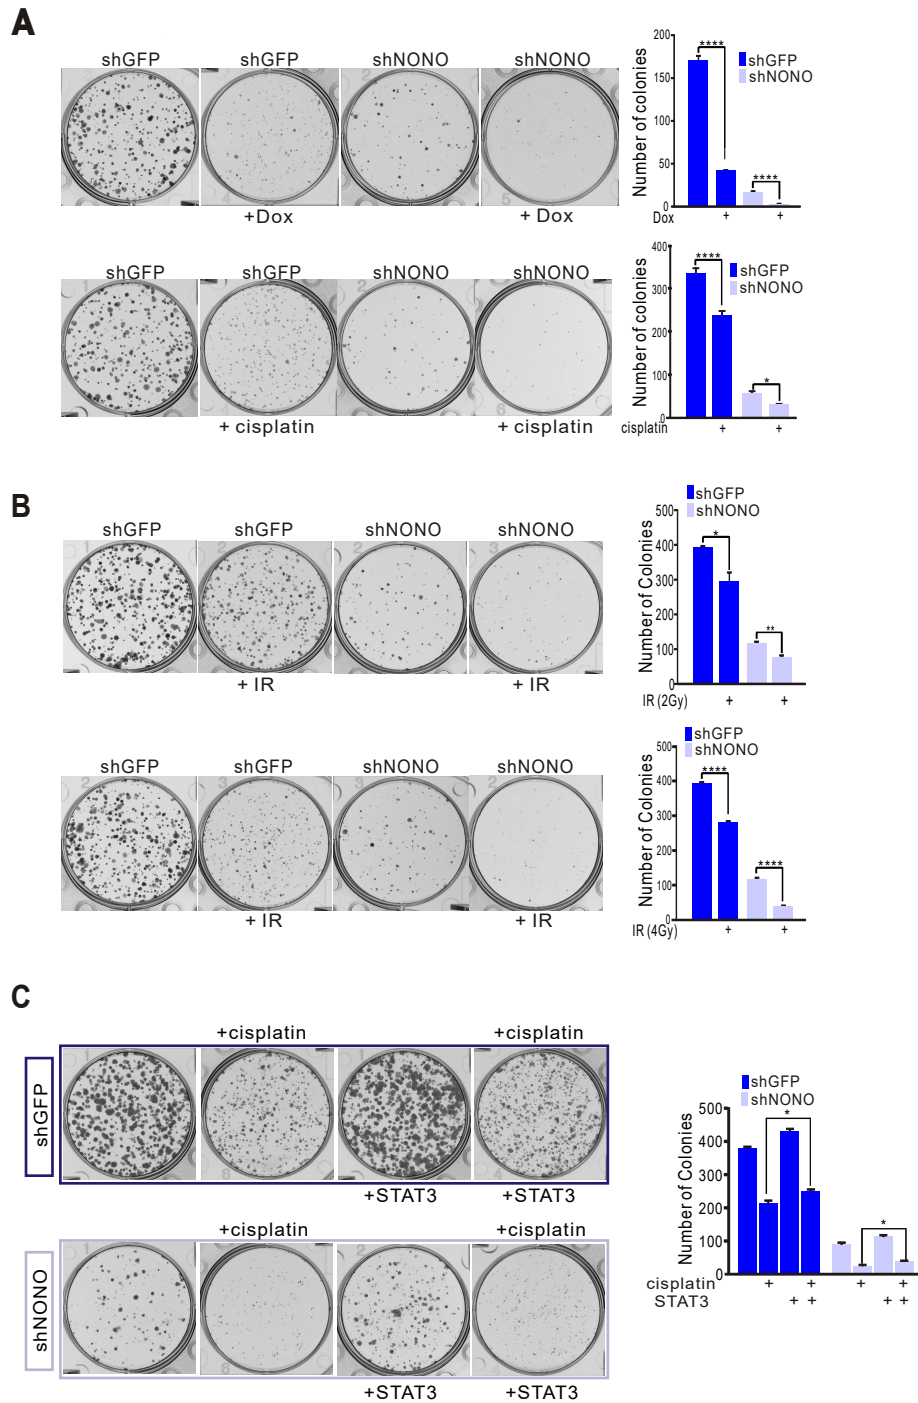

**Figure S11 Silencing NONO contributes to chemo and radiation sensitization in breast cancer cells**

A-C, MDA-MB-231 breast cancer cells were stably transfected with shNONO or shGFP. The cells were treated with indicated drugs (A; C, Dox: 10nM, cisplatin: 3.34nM) or were exposed to radiation (IR; 2 or 4 Gy) (B) and after 14 days, the cells were used for colony formation assay and quantified ( $n=3$ ). Student t-test (two-tailed) was applied to estimate the significance of cell proliferation. \* indicates significance of cell proliferation, \*  $p < 0.05$ , \*\*  $p < 0.01$ , \*\*\*  $p < 0.005$ , and \*\*\*\*  $p < 0.001$ .
